# Supplementary material
Source: HighWire-hosted journal article supplement (http://jnm-client.smart01.highwire.org/highwire/filestream/118448/field_highwire_adjunct_files/0/266463_Supplemental_Data.pdf)
Supplement: 266463_Supplemental_Data.pdf [file 266463_Supplemental_Data.pdf]

## Supplemental Data

Supplemental Figure 1. Amyloid PET with volume loss.

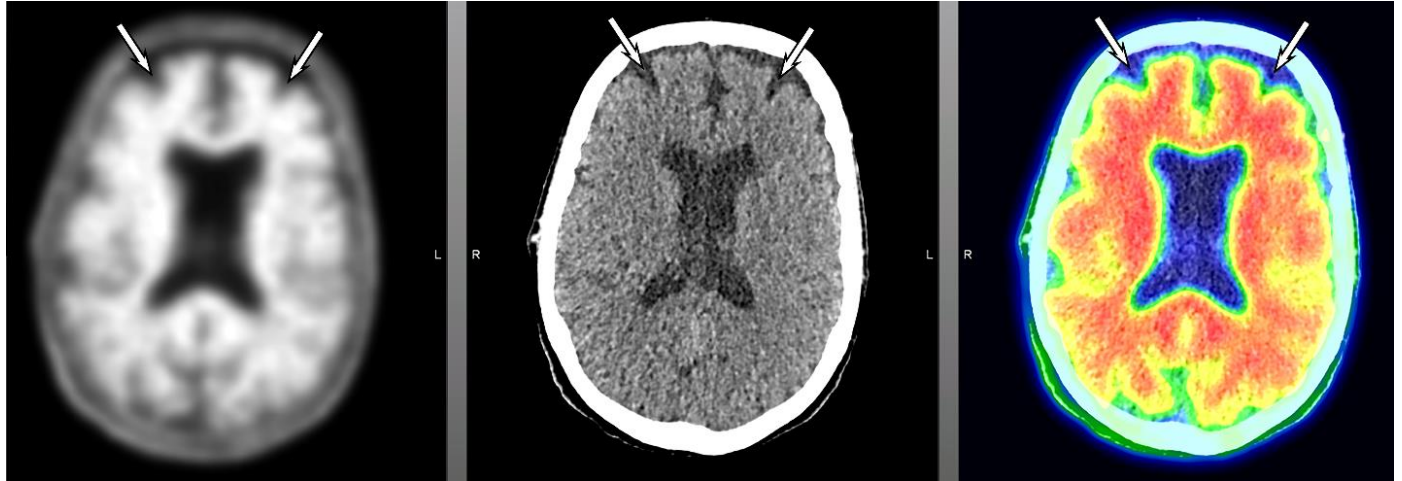

Supplemental Figure 1. Amyloid PET with volume loss. Pitfall of positive  $^{18}\text{F}$ -florbetapir PET with volume loss, for example in the frontal lobes (arrows), which could mimic the appearance of preserved gray-white contrast expected in a negative scan.

**Supplemental Figure 2. Tau and Amyloid radiotracer uptake within meningiomas.**

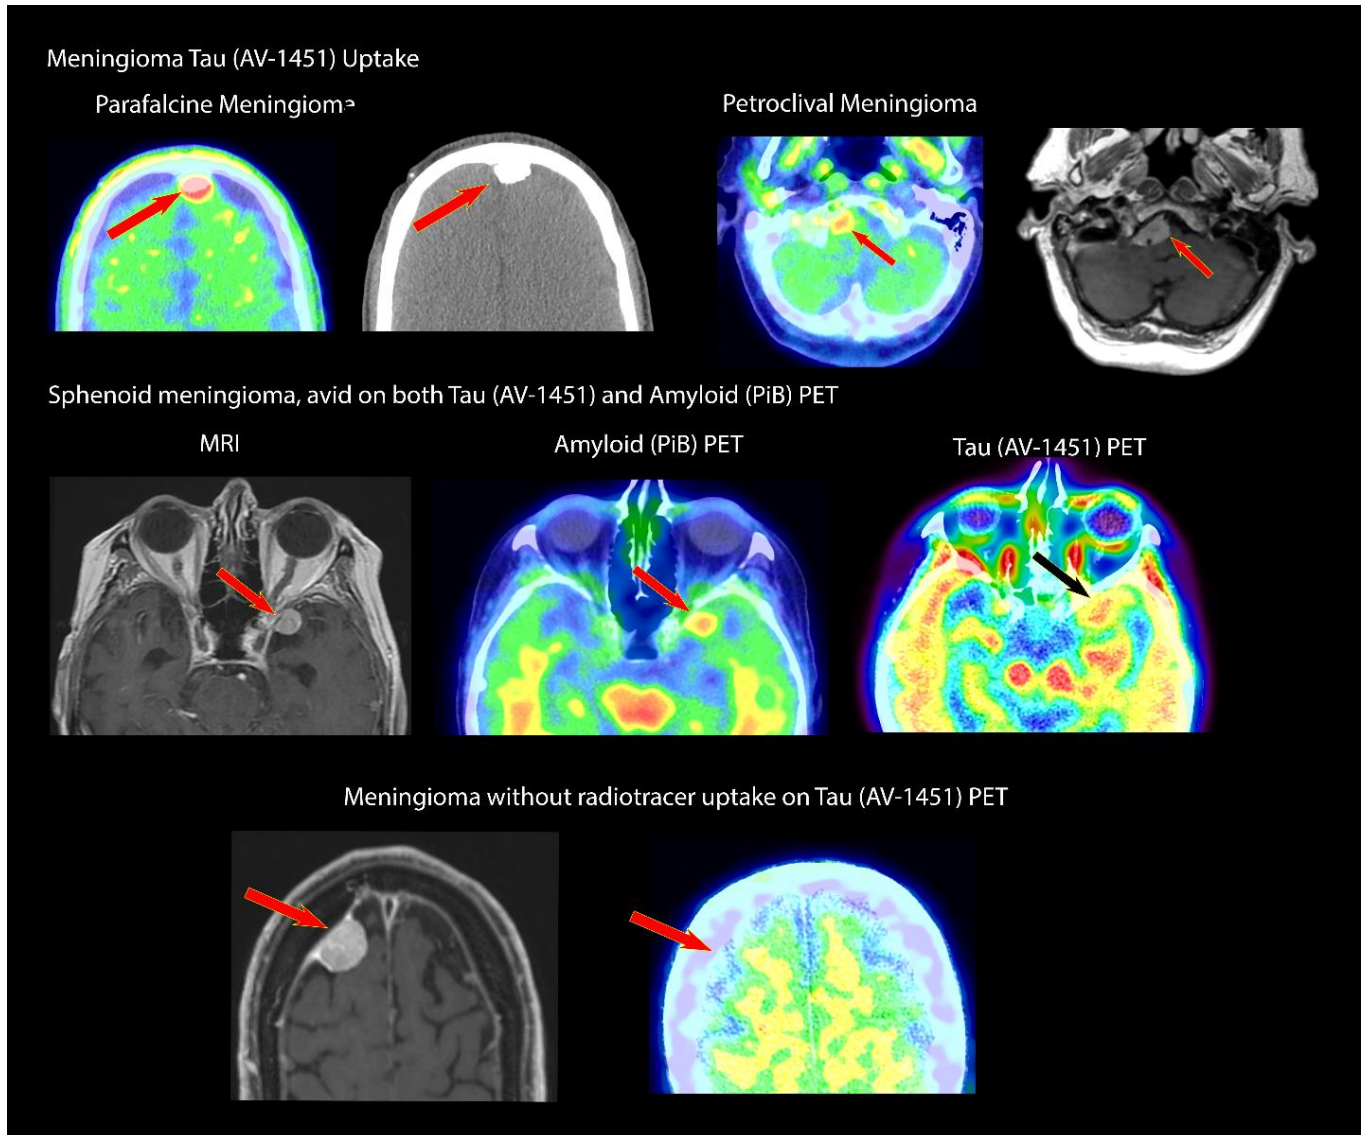

Supplemental Figure 2. Tau and Amyloid radiotracer uptake within meningiomas. Meningioma are relatively common extra-axial masses that can be avid on tau PET performed with flortaucipir (first and second rows, red arrows) and  $^{11}\text{C}$  Pittsburgh Compound B PET (second row, black arrow). Radiotracer uptake within meningiomas can be variable, with some having no uptake (third row, red arrows).

**Supplemental Figure 3. Positive Tau PET in prion protein octapeptide repeat insertion.**

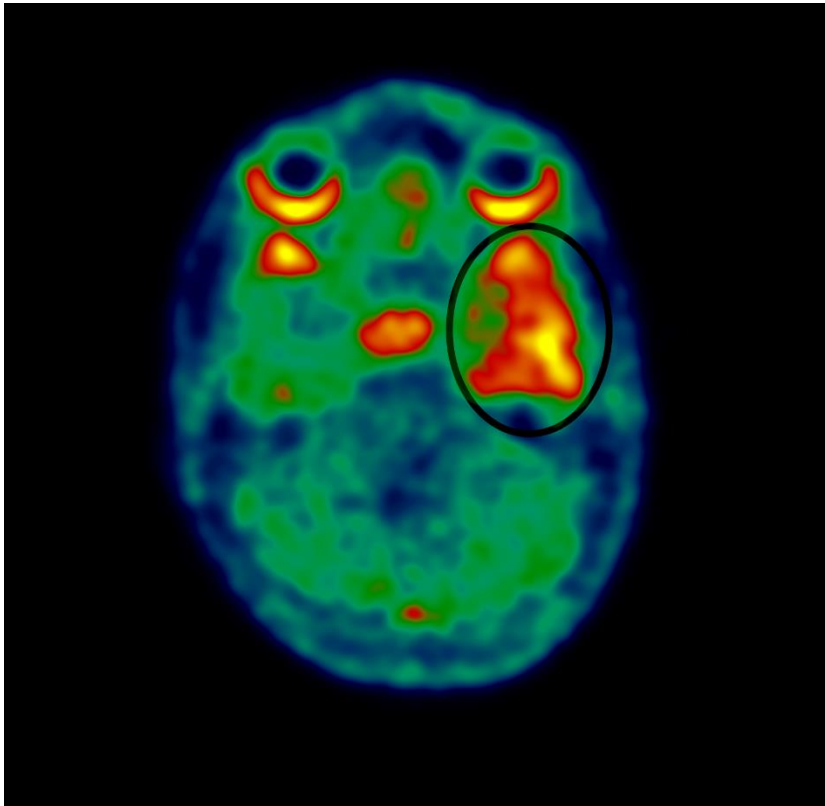

Supplemental Figure 3. Positive Tau PET in prion protein octapeptide repeat insertion.  $^{18}\text{F}$ -flortaucipir PET is positive in the left temporal lobe (black ellipse). This patient had a negative amyloid PET (not pictured). Although a positive tau PET can be seen with Alzheimer's, alternative neurodegenerative entities should be considered especially in the setting of a negative amyloid PET.
